# Supplementary material
Source: HighWire-hosted journal article supplement (https://bmjopenquality.bmj.com/highwire/filestream/143197/field_highwire_adjunct_files/0/bmjoq-2021-001617supp001_data_supplement.pdf)

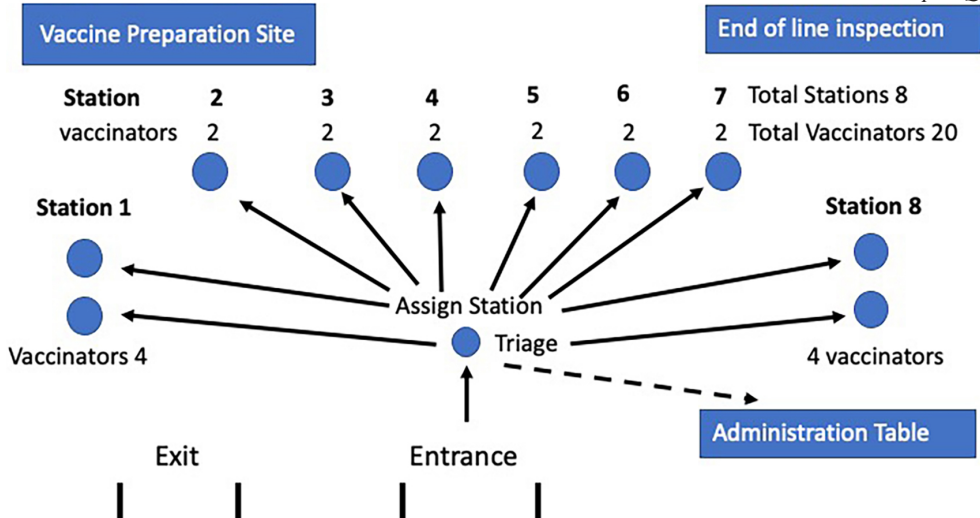

Supplement: bmjoq-2021-001617supp001_data_supplement.pdf [file bmjoq-2021-001617supp001_data_supplement.pdf]
